# Supplementary material for: Dendritic nano- and microhydrogels fabricated by triethoxysilyl focal dendrons
Source: Royal Society of Chemistry journal article supplement (doi:10.1039/b515299b), 2005-12-14
Supplement: b515299b.pdf [file b515299b.pdf]

## Dendritic nano- and microhydrogels fabricated by triethoxysilyl focal dendrons

Daisuke ONOSHIMA<sup>1</sup> and Toyoko IMAE<sup>1,2\*</sup>

<sup>1</sup>Graduate School of Science and <sup>2</sup>Research Center for Materials Science,

Nagoya University, Chikusa, Nagoya 464-8602, Japan imae@nano.chem.nagoya-u.ac.jp

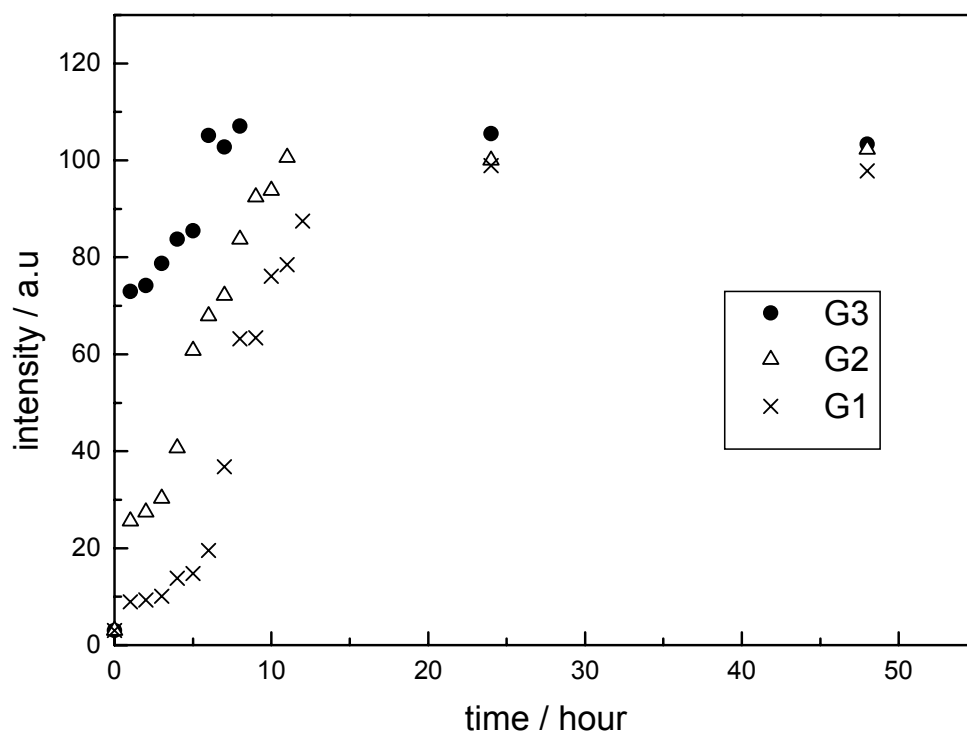

**Figure S1.** Time dependence of scattering intensity during gelation of G1 – 3 dendrons without catalyst. Time “zero” indicates just after stirring.

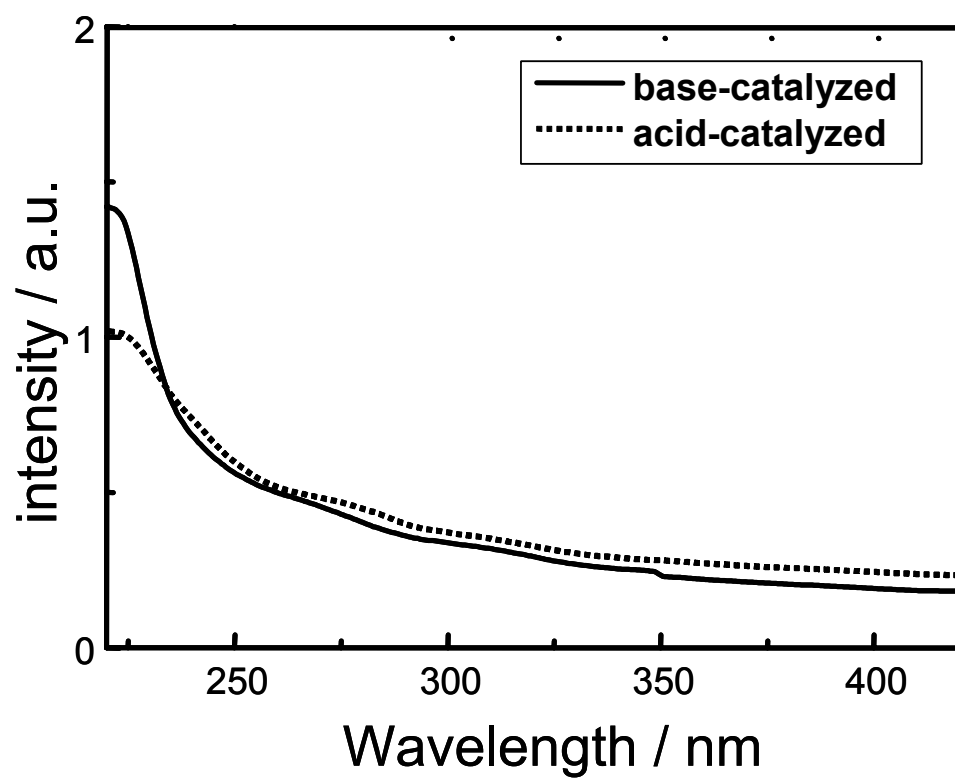

**Figure S2.** UV-visible absorption spectra of G3 dendron hydrogels.

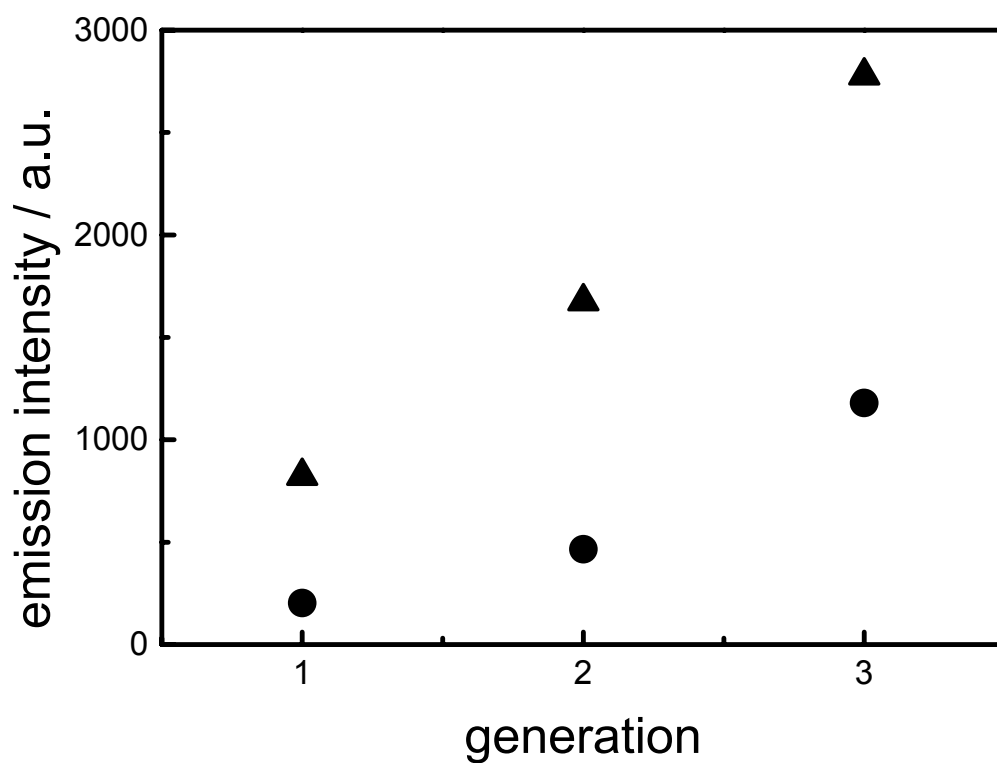

**Figure S3.** Generation dependence of emission intensity of dendron hydrogels. ● : acid-catalyzed (pH ~ 3, Ex 355 nm, Em 428 nm), ▲ : base-catalyzed (pH ~ 10, Ex 345 nm, Em 419 nm).
